# Supplementary material for: Transport properties of a three-shell icosahedral matryoshka cluster: a first-principles study
Source: Royal Society of Chemistry journal article supplement (doi:10.1039/c7ra01003f), 2017-01-01
Supplement: c7ra01003f1.pdf [file c7ra01003f1.pdf]

## Supplementary information

### Transport properties of a three-shell icosahedral matryoshka cluster: A first-principles study

Lu Zhang,<sup>a</sup> Jing Huang,<sup>b,\*</sup> Weiyi Wang,<sup>a</sup> Qunxiang Li,<sup>a, \*\*</sup> and Jinlong Yang<sup>a</sup>

<sup>a</sup>Hefei National Laboratory for Physical Sciences at the Microscale & Synergetic Innovation Center of Quantum Information and Quantum Physics, University of Science and Technology of China, Hefei, Anhui 230026, China. E-mail:

[liqun@ustc.edu.cn](mailto:liqun@ustc.edu.cn)

School of Materials and Chemical Engineering, Anhui Jianzhu University, Hefei, Anhui 230601, China. E-mail: [jhuang@ustc.edu.cn](mailto:jhuang@ustc.edu.cn)

The calculated transmission spectra through the Pb@Mn<sub>12</sub>@Pb<sub>20</sub> cluster connected to Au and Li electrodes with different anchoring configurations.

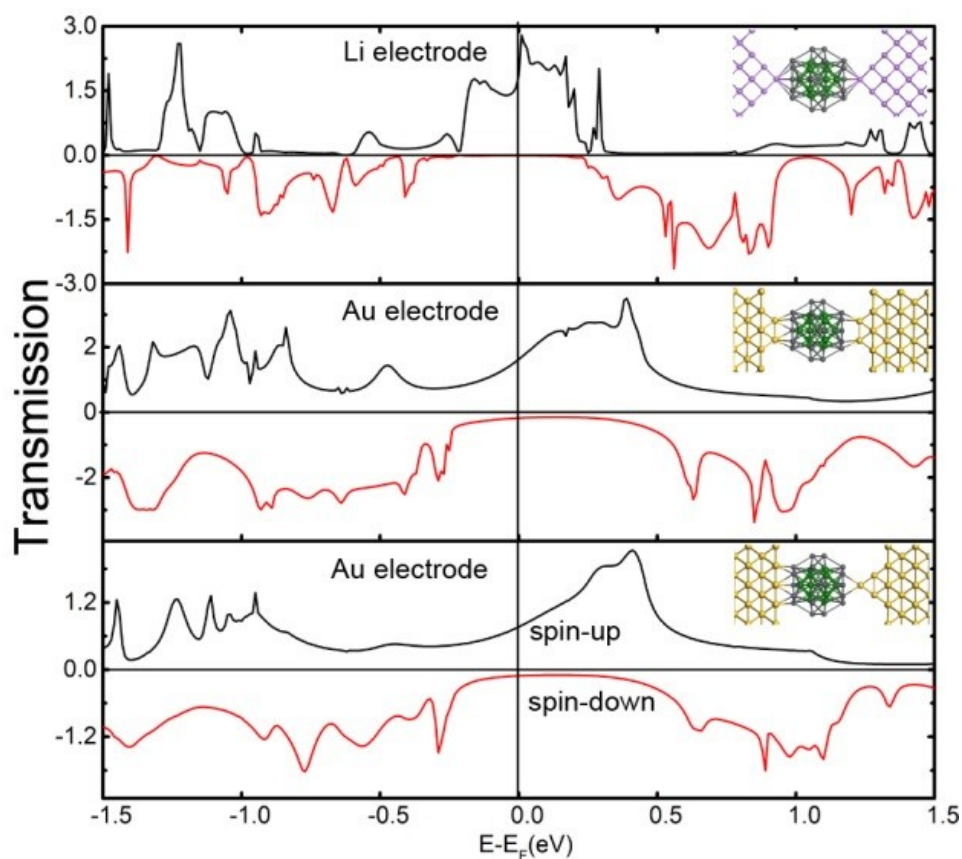

Figure S1 - Zero-bias energy dependent spin-resolved transmission spectra. Here, inserts schematically illustrate the examined junction.

Table S1-The coordinates of the Pb@Mn<sub>12</sub>@Pb<sub>20</sub> cluster

|      |        |        |        |
|------|--------|--------|--------|
| Pb1  | -2.791 | 0.000  | -3.653 |
| Pb2  | -4.516 | 0.000  | -0.862 |
| Pb3  | -3.653 | -2.654 | 0.862  |
| Pb4  | -1.395 | -4.295 | -0.862 |
| Pb5  | -0.862 | -2.654 | -3.653 |
| Pb6  | 1.395  | -4.295 | 0.862  |
| Pb7  | 2.258  | -1.640 | -3.653 |
| Pb8  | -0.862 | 2.654  | -3.653 |
| Pb9  | -3.653 | 2.654  | 0.862  |
| Pb10 | -2.258 | -1.640 | 3.653  |
| Pb11 | -2.258 | 1.640  | 3.653  |
| Pb12 | 0.862  | -2.654 | 3.653  |
| Pb13 | 3.653  | -2.654 | -0.862 |
| Pb14 | 2.258  | 1.640  | -3.653 |
| Pb15 | -1.395 | 4.295  | -0.862 |
| Pb16 | 1.395  | 4.295  | 0.862  |
| Pb17 | 0.862  | 2.654  | 3.653  |
| Pb18 | 2.791  | 0.000  | 3.653  |
| Pb19 | 4.516  | 0.000  | 0.862  |
| Pb20 | 3.653  | 2.654  | -0.862 |
| Pb21 | 0.000  | 0.000  | 0.000  |
| Mn22 | -1.892 | -1.374 | -1.169 |
| Mn23 | -1.892 | 1.374  | -1.169 |
| Mn24 | -2.338 | 0.000  | 1.169  |
| Mn25 | -0.723 | -2.224 | 1.169  |
| Mn26 | 0.723  | -2.224 | -1.169 |
| Mn27 | 0.000  | 0.000  | -2.614 |
| Mn28 | 2.338  | 0.000  | -1.169 |
| Mn29 | 0.723  | 2.224  | -1.169 |
| Mn30 | -0.723 | 2.224  | 1.169  |
| Mn31 | 0.000  | 0.000  | 2.614  |
| Mn32 | 1.892  | -1.374 | 1.169  |
| Mn33 | 1.892  | 1.374  | 1.169  |

Table S2 – The coordinates of Pb@Mn<sub>12</sub>@Pb<sub>20</sub> cluster adsorption on Au(100) surface at the bridge site.

|      |        |        |        |
|------|--------|--------|--------|
| Pb1  | 8.850  | 6.393  | 4.689  |
| Pb2  | 9.864  | 4.998  | 7.480  |
| Pb3  | 11.504 | 7.256  | 9.205  |
| Pb4  | 11.504 | 10.047 | 7.480  |
| Pb5  | 9.864  | 9.514  | 4.689  |
| Pb6  | 9.864  | 12.305 | 9.205  |
| Pb7  | 7.209  | 11.442 | 4.689  |
| Pb8  | 5.569  | 6.393  | 4.689  |
| Pb9  | 7.209  | 4.135  | 9.205  |
| Pb10 | 9.864  | 7.789  | 11.996 |
| Pb11 | 7.209  | 5.860  | 11.996 |
| Pb12 | 8.850  | 10.909 | 11.996 |
| Pb13 | 7.209  | 13.167 | 7.480  |
| Pb14 | 4.555  | 9.514  | 4.689  |
| Pb15 | 4.555  | 4.998  | 7.480  |
| Pb16 | 2.915  | 7.256  | 9.205  |
| Pb17 | 4.555  | 7.789  | 11.996 |
| Pb18 | 5.569  | 10.909 | 11.996 |
| Pb19 | 4.555  | 12.305 | 9.205  |
| Pb20 | 2.915  | 10.047 | 7.480  |
| Pb21 | 7.209  | 8.651  | 8.343  |
| Mn22 | 9.433  | 7.929  | 7.173  |
| Mn23 | 7.209  | 6.313  | 7.173  |
| Mn24 | 8.584  | 6.760  | 9.512  |
| Mn25 | 9.433  | 9.374  | 9.512  |
| Mn26 | 8.584  | 10.543 | 7.173  |
| Mn27 | 7.209  | 8.651  | 5.728  |
| Mn28 | 5.835  | 10.543 | 7.173  |
| Mn29 | 4.986  | 7.929  | 7.173  |
| Mn30 | 5.835  | 6.760  | 9.512  |
| Mn31 | 7.209  | 8.651  | 10.957 |
| Mn32 | 7.209  | 10.990 | 9.512  |
| Mn33 | 4.986  | 9.374  | 9.512  |
| Au1  | 0.000  | 0.000  | 0.000  |
| Au2  | 1.442  | 1.442  | 2.039  |
| Au3  | 2.884  | 0.000  | 0.000  |
| Au4  | 4.326  | 1.442  | 2.039  |
| Au5  | 5.768  | 0.000  | 0.000  |
| Au6  | 7.209  | 1.442  | 2.039  |
| Au7  | 8.651  | 0.000  | 0.000  |
| Au8  | 10.093 | 1.442  | 2.039  |
| Au9  | 11.535 | 0.000  | 0.000  |

|      |        |        |       |
|------|--------|--------|-------|
| Au10 | 12.977 | 1.442  | 2.039 |
| Au11 | 14.419 | 0.000  | 0.000 |
| Au12 | 15.861 | 1.442  | 2.039 |
| Au13 | 0.000  | 2.884  | 0.000 |
| Au14 | 1.442  | 4.326  | 2.039 |
| Au15 | 2.884  | 2.884  | 0.000 |
| Au16 | 4.326  | 4.326  | 2.039 |
| Au17 | 5.768  | 2.884  | 0.000 |
| Au18 | 7.209  | 4.326  | 2.039 |
| Au19 | 8.651  | 2.884  | 0.000 |
| Au20 | 10.093 | 4.326  | 2.039 |
| Au21 | 11.535 | 2.884  | 0.000 |
| Au22 | 12.977 | 4.326  | 2.039 |
| Au23 | 14.419 | 2.884  | 0.000 |
| Au24 | 15.861 | 4.326  | 2.039 |
| Au25 | 0.000  | 5.768  | 0.000 |
| Au26 | 1.442  | 7.209  | 2.039 |
| Au27 | 2.884  | 5.768  | 0.000 |
| Au28 | 4.326  | 7.209  | 2.039 |
| Au29 | 5.768  | 5.768  | 0.000 |
| Au30 | 7.209  | 7.209  | 2.039 |
| Au31 | 8.651  | 5.768  | 0.000 |
| Au32 | 10.093 | 7.209  | 2.039 |
| Au33 | 11.535 | 5.768  | 0.000 |
| Au34 | 12.977 | 7.209  | 2.039 |
| Au35 | 14.419 | 5.768  | 0.000 |
| Au36 | 15.861 | 7.209  | 2.039 |
| Au37 | 0.000  | 8.651  | 0.000 |
| Au38 | 1.442  | 10.093 | 2.039 |
| Au39 | 2.884  | 8.651  | 0.000 |
| Au40 | 4.326  | 10.093 | 2.039 |
| Au41 | 5.768  | 8.651  | 0.000 |
| Au42 | 7.209  | 10.093 | 2.039 |
| Au43 | 8.651  | 8.651  | 0.000 |
| Au44 | 10.093 | 10.093 | 2.039 |
| Au45 | 11.535 | 8.651  | 0.000 |
| Au46 | 12.977 | 10.093 | 2.039 |
| Au47 | 14.419 | 8.651  | 0.000 |
| Au48 | 15.861 | 10.093 | 2.039 |
| Au49 | 0.000  | 11.535 | 0.000 |
| Au50 | 1.442  | 12.977 | 2.039 |
| Au51 | 2.884  | 11.535 | 0.000 |
| Au52 | 4.326  | 12.977 | 2.039 |
| Au53 | 5.768  | 11.535 | 0.000 |

|      |        |        |       |
|------|--------|--------|-------|
| Au54 | 7.209  | 12.977 | 2.039 |
| Au55 | 8.651  | 11.535 | 0.000 |
| Au56 | 10.093 | 12.977 | 2.039 |
| Au57 | 11.535 | 11.535 | 0.000 |
| Au58 | 12.977 | 12.977 | 2.039 |
| Au59 | 14.419 | 11.535 | 0.000 |
| Au60 | 15.861 | 12.977 | 2.039 |
| Au61 | 0.000  | 14.419 | 0.000 |
| Au62 | 1.442  | 15.861 | 2.039 |
| Au63 | 2.884  | 14.419 | 0.000 |
| Au64 | 4.326  | 15.861 | 2.039 |
| Au65 | 5.768  | 14.419 | 0.000 |
| Au66 | 7.209  | 15.861 | 2.039 |
| Au67 | 8.651  | 14.419 | 0.000 |
| Au68 | 10.093 | 15.861 | 2.039 |
| Au69 | 11.535 | 14.419 | 0.000 |
| Au70 | 12.977 | 15.861 | 2.039 |
| Au71 | 14.419 | 14.419 | 0.000 |
| Au72 | 15.861 | 15.861 | 2.039 |

Table S3 – The coordinates of atoms in the scattering region of Pb@Mn<sub>12</sub>@Pb<sub>20</sub> junction, in which the cluster is sandwiched between two Au (100) electrodes

|    |        |        |       |
|----|--------|--------|-------|
| Au | 2.163  | 2.163  | 1.249 |
| Au | 5.047  | 2.163  | 1.249 |
| Au | 7.930  | 2.163  | 1.249 |
| Au | 10.814 | 2.163  | 1.249 |
| Au | 13.698 | 2.163  | 1.249 |
| Au | 2.163  | 5.047  | 1.249 |
| Au | 5.047  | 5.047  | 1.249 |
| Au | 7.930  | 5.047  | 1.249 |
| Au | 10.814 | 5.047  | 1.249 |
| Au | 13.698 | 5.047  | 1.249 |
| Au | 2.163  | 7.930  | 1.249 |
| Au | 5.047  | 7.930  | 1.249 |
| Au | 7.930  | 7.930  | 1.249 |
| Au | 10.814 | 7.930  | 1.249 |
| Au | 13.698 | 7.930  | 1.249 |
| Au | 2.163  | 10.814 | 1.249 |
| Au | 5.047  | 10.814 | 1.249 |
| Au | 7.930  | 10.814 | 1.249 |
| Au | 10.814 | 10.814 | 1.249 |
| Au | 13.698 | 10.814 | 1.249 |
| Au | 2.163  | 13.698 | 1.249 |

|    |        |        |       |
|----|--------|--------|-------|
| Au | 5.047  | 13.698 | 1.249 |
| Au | 7.930  | 13.698 | 1.249 |
| Au | 10.814 | 13.698 | 1.249 |
| Au | 13.698 | 13.698 | 1.249 |
| Au | 0.721  | 0.721  | 3.288 |
| Au | 3.605  | 0.721  | 3.288 |
| Au | 6.488  | 0.721  | 3.288 |
| Au | 9.372  | 0.721  | 3.288 |
| Au | 12.256 | 0.721  | 3.288 |
| Au | 0.721  | 3.605  | 3.288 |
| Au | 3.605  | 3.605  | 3.288 |
| Au | 6.488  | 3.605  | 3.288 |
| Au | 9.372  | 3.605  | 3.288 |
| Au | 12.256 | 3.605  | 3.288 |
| Au | 0.721  | 6.488  | 3.288 |
| Au | 3.605  | 6.488  | 3.288 |
| Au | 6.488  | 6.488  | 3.288 |
| Au | 9.372  | 6.488  | 3.288 |
| Au | 12.256 | 6.488  | 3.288 |
| Au | 0.721  | 9.372  | 3.288 |
| Au | 3.605  | 9.372  | 3.288 |
| Au | 6.488  | 9.372  | 3.288 |
| Au | 9.372  | 9.372  | 3.288 |
| Au | 12.256 | 9.372  | 3.288 |
| Au | 0.721  | 12.256 | 3.288 |
| Au | 3.605  | 12.256 | 3.288 |
| Au | 6.488  | 12.256 | 3.288 |
| Au | 9.372  | 12.256 | 3.288 |
| Au | 12.256 | 12.256 | 3.288 |
| Pb | 6.274  | 4.208  | 5.938 |
| Pb | 9.587  | 4.208  | 5.938 |
| Pb | 5.250  | 7.359  | 5.938 |
| Pb | 10.611 | 7.359  | 5.938 |
| Pb | 7.930  | 9.307  | 5.938 |
| Mn | 7.930  | 6.488  | 6.979 |
| Mn | 7.930  | 4.119  | 8.443 |
| Mn | 5.677  | 5.756  | 8.443 |
| Mn | 10.184 | 5.756  | 8.443 |
| Mn | 6.538  | 8.405  | 8.443 |
| Mn | 9.323  | 8.405  | 8.443 |
| Pb | 5.250  | 2.799  | 8.757 |
| Pb | 10.611 | 2.799  | 8.757 |
| Pb | 3.593  | 7.898  | 8.757 |
| Pb | 12.268 | 7.898  | 8.757 |

|    |        |        |        |
|----|--------|--------|--------|
| Pb | 7.930  | 11.049 | 8.757  |
| Pb | 7.930  | 6.488  | 9.628  |
| Pb | 7.930  | 1.928  | 10.499 |
| Pb | 3.593  | 5.079  | 10.499 |
| Pb | 12.268 | 5.079  | 10.499 |
| Pb | 5.250  | 10.178 | 10.499 |
| Pb | 10.611 | 10.178 | 10.499 |
| Mn | 6.538  | 4.572  | 10.812 |
| Mn | 9.323  | 4.572  | 10.812 |
| Mn | 5.677  | 7.221  | 10.812 |
| Mn | 10.184 | 7.221  | 10.812 |
| Mn | 7.930  | 8.858  | 10.812 |
| Mn | 7.930  | 6.488  | 12.277 |
| Pb | 7.930  | 3.670  | 13.317 |
| Pb | 5.250  | 5.618  | 13.317 |
| Pb | 10.611 | 5.618  | 13.317 |
| Pb | 6.274  | 8.769  | 13.317 |
| Pb | 9.587  | 8.769  | 13.317 |
| Au | 7.930  | 5.047  | 15.967 |
| Au | 7.930  | 7.930  | 15.967 |
| Au | 0.721  | 0.721  | 18.006 |
| Au | 3.605  | 0.721  | 18.006 |
| Au | 6.488  | 0.721  | 18.006 |
| Au | 9.372  | 0.721  | 18.006 |
| Au | 12.256 | 0.721  | 18.006 |
| Au | 0.721  | 3.605  | 18.006 |
| Au | 3.605  | 3.605  | 18.006 |
| Au | 6.488  | 3.605  | 18.006 |
| Au | 9.372  | 3.605  | 18.006 |
| Au | 12.256 | 3.605  | 18.006 |
| Au | 0.721  | 6.488  | 18.006 |
| Au | 3.605  | 6.488  | 18.006 |
| Au | 6.488  | 6.488  | 18.006 |
| Au | 9.372  | 6.488  | 18.006 |
| Au | 12.256 | 6.488  | 18.006 |
| Au | 0.721  | 9.372  | 18.006 |
| Au | 3.605  | 9.372  | 18.006 |
| Au | 6.488  | 9.372  | 18.006 |
| Au | 9.372  | 9.372  | 18.006 |
| Au | 12.256 | 9.372  | 18.006 |
| Au | 0.721  | 12.256 | 18.006 |
| Au | 3.605  | 12.256 | 18.006 |
| Au | 6.488  | 12.256 | 18.006 |
| Au | 9.372  | 12.256 | 18.006 |

|    |        |        |        |
|----|--------|--------|--------|
| Au | 12.256 | 12.256 | 18.006 |
| Au | 2.163  | 2.163  | 20.045 |
| Au | 5.047  | 2.163  | 20.045 |
| Au | 7.930  | 2.163  | 20.045 |
| Au | 10.814 | 2.163  | 20.045 |
| Au | 13.698 | 2.163  | 20.045 |
| Au | 2.163  | 5.047  | 20.045 |
| Au | 5.047  | 5.047  | 20.045 |
| Au | 7.930  | 5.047  | 20.045 |
| Au | 10.814 | 5.047  | 20.045 |
| Au | 13.698 | 5.047  | 20.045 |
| Au | 2.163  | 7.930  | 20.045 |
| Au | 5.047  | 7.930  | 20.045 |
| Au | 7.930  | 7.930  | 20.045 |
| Au | 10.814 | 7.930  | 20.045 |
| Au | 13.698 | 7.930  | 20.045 |
| Au | 2.163  | 10.814 | 20.045 |
| Au | 5.047  | 10.814 | 20.045 |
| Au | 7.930  | 10.814 | 20.045 |
| Au | 10.814 | 10.814 | 20.045 |
| Au | 13.698 | 10.814 | 20.045 |
| Au | 2.163  | 13.698 | 20.045 |
| Au | 5.047  | 13.698 | 20.045 |
| Au | 7.930  | 13.698 | 20.045 |
| Au | 10.814 | 13.698 | 20.045 |
| Au | 13.698 | 13.698 | 20.045 |
| Au | 0.721  | 0.721  | 22.085 |
| Au | 3.605  | 0.721  | 22.085 |
| Au | 6.488  | 0.721  | 22.085 |
| Au | 9.372  | 0.721  | 22.085 |
| Au | 12.256 | 0.721  | 22.085 |
| Au | 0.721  | 3.605  | 22.085 |
| Au | 3.605  | 3.605  | 22.085 |
| Au | 6.488  | 3.605  | 22.085 |
| Au | 9.372  | 3.605  | 22.085 |
| Au | 12.256 | 3.605  | 22.085 |
| Au | 0.721  | 6.488  | 22.085 |
| Au | 3.605  | 6.488  | 22.085 |
| Au | 6.488  | 6.488  | 22.085 |
| Au | 9.372  | 6.488  | 22.085 |
| Au | 12.256 | 6.488  | 22.085 |
| Au | 0.721  | 9.372  | 22.085 |
| Au | 3.605  | 9.372  | 22.085 |
| Au | 6.488  | 9.372  | 22.085 |



|    |        |        |        |
|----|--------|--------|--------|
| Au | 9.372  | 9.372  | 22.085 |
| Au | 12.256 | 9.372  | 22.085 |
| Au | 0.721  | 12.256 | 22.085 |
| Au | 3.605  | 12.256 | 22.085 |
| Au | 6.488  | 12.256 | 22.085 |
| Au | 9.372  | 12.256 | 22.085 |
| Au | 12.256 | 12.256 | 22.085 |
